# Supplementary material for: siRNAmod: A database of experimentally validated chemically modified siRNAs
Source: PubMed Central journal article supplement (PMC4730238; doi:10.1038/srep20031), 2016-01-28
Supplement: srep20031-s1.pdf [file srep20031-s1.pdf]

# **siRNAmod: A database of experimentally validated chemically modified siRNAs**

Showkat Ahmad Dar<sup>1</sup>, Anamika Thakur<sup>1</sup>, Abid Qureshi<sup>1</sup> and Manoj Kumar<sup>1,\*</sup>

1 Bioinformatics Centre, Institute of Microbial Technology, Council of Scientific and Industrial Research, Sector 39A, Chandigarh-160036, India

\* To whom correspondence should be addressed: Tel.: +91-172-6665453; Fax: +91-172-2690585, 2690632; Email: [manojk@imtech.res.in](mailto:manojk@imtech.res.in)

Showkat Ahmad Dar

Bioinformatics Centre, Institute of Microbial Technology, Council of Scientific and Industrial Research, Sector 39A, Chandigarh-160036, India

[showkat@imtech.res.in](mailto:showkat@imtech.res.in)

Anamika Thakur

Bioinformatics Centre, Institute of Microbial Technology, Council of Scientific and Industrial Research, Sector 39A, Chandigarh-160036, India

[anamikathakur@imtech.res.in](mailto:anamikathakur@imtech.res.in)

Abid Qureshi

Bioinformatics Centre, Institute of Microbial Technology, Council of Scientific and Industrial Research, Sector 39A, Chandigarh-160036, India

[qureshisaab@imtech.res.in](mailto:qureshisaab@imtech.res.in)

Manoj Kumar

Bioinformatics Centre, Institute of Microbial Technology, Council of Scientific and Industrial Research, Sector 39A, Chandigarh-160036, India

[manojk@imtech.res.in](mailto:manojk@imtech.res.in)

## **Additional files**

### **Additional file 1**

**Figure S1.** Distribution of natural and non-natural chemical modifications.

**Figure S2.** Relative frequency of chemical modifications on sense and antisense cm-siRNAs for 21 base pair.

**Figure S3.** Cumulative frequency of cm-siRNA modifications on sense and antisense sequences.

**Figure S4.** Grouping frequency of different unique chemical modifications.

**Figure S5.** Cell lines distribution in siRNAmdb database.

### Natural and non natural based distribution of chemical modifications

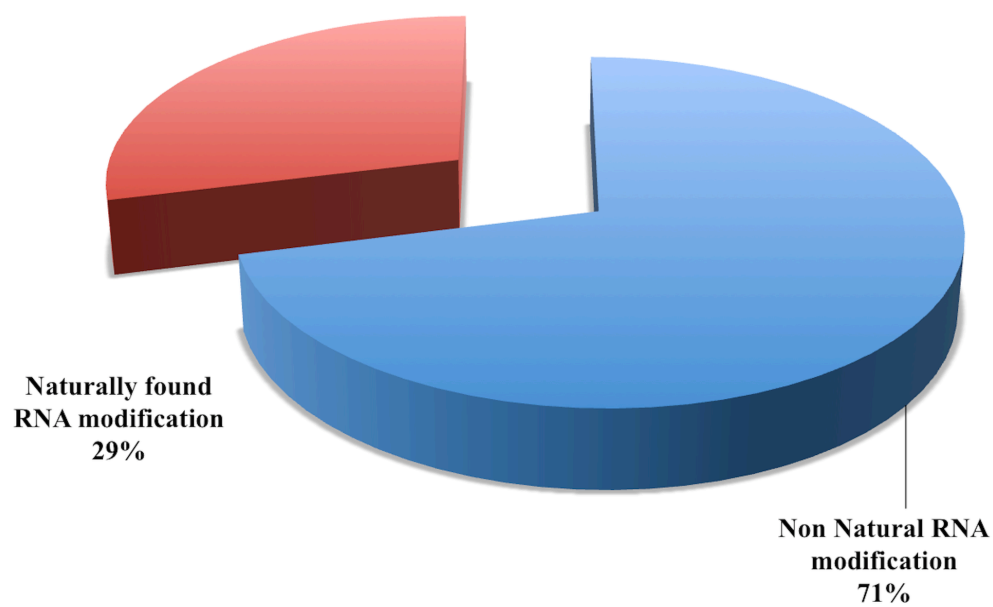

**Figure S1.** Distribution of natural and non-natural chemical modifications.

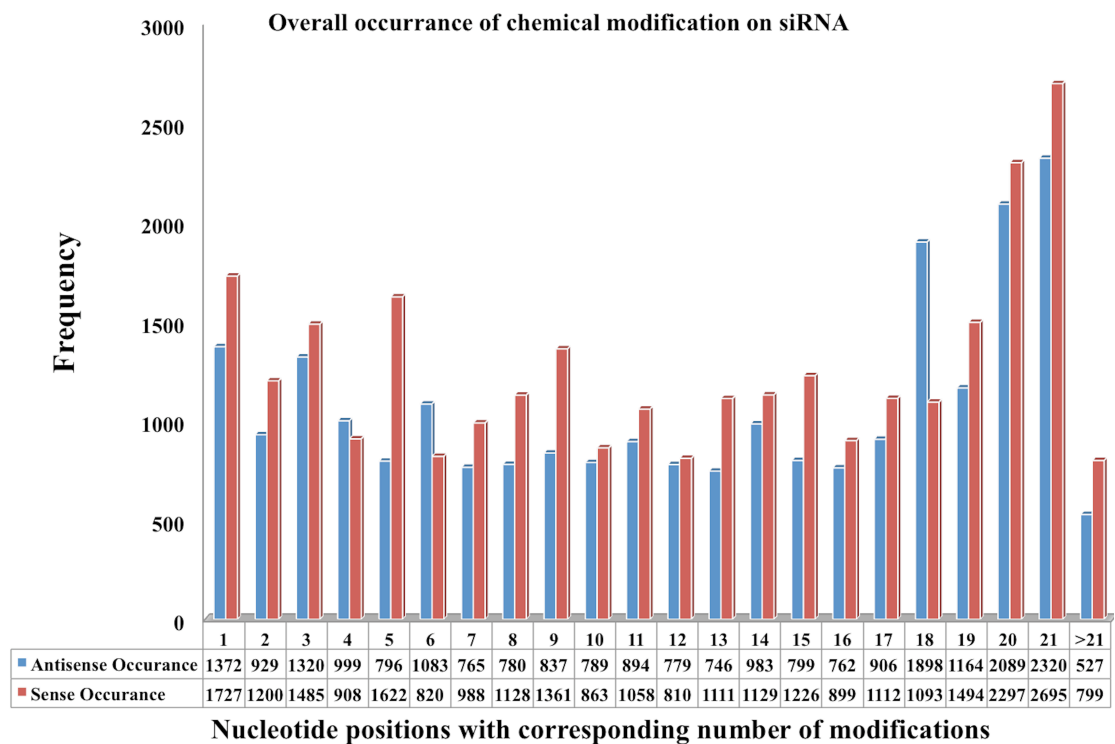

**Figure S2.** Relative frequency of chemical modifications on sense and antisense cm-siRNAs for 21 base pair. Nucleotide position represented as 1 to 21 both starting from 5' end on X-axis. >21 signifies end modifications or additional modifications attached after 21<sup>st</sup> nucleotide. Further number of each position is provided below its corresponding position.

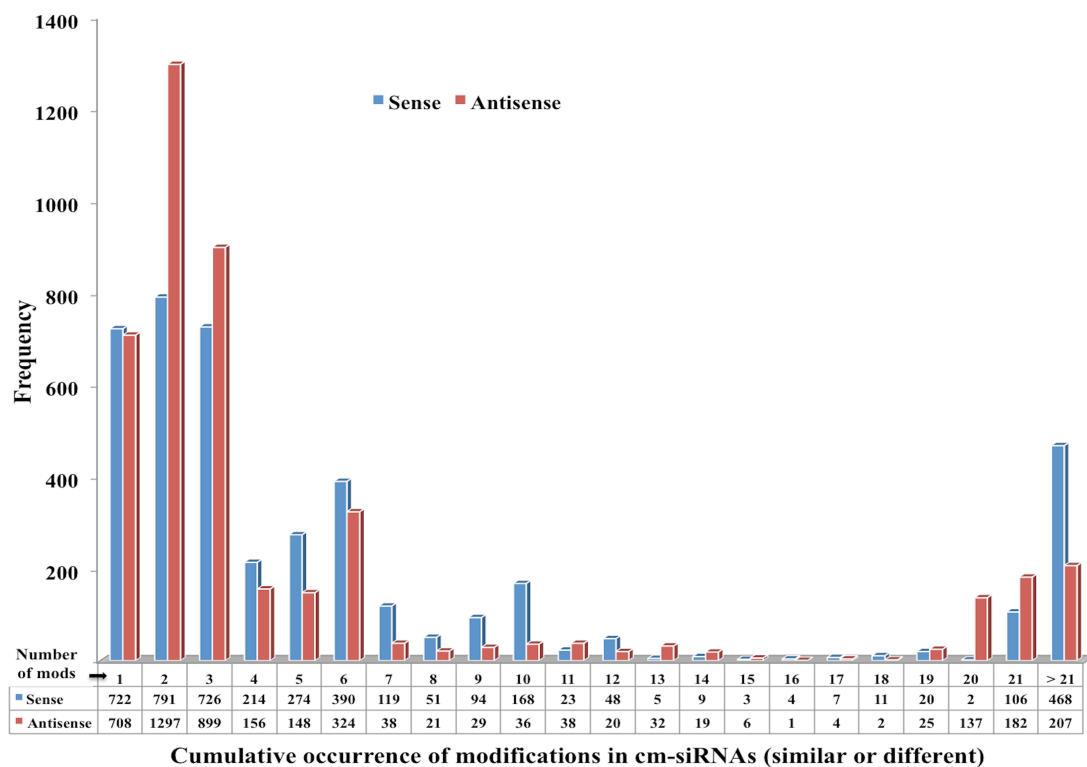

**Figure S3.** Cumulative frequency of cm-siRNA modifications on sense and antisense sequences. Number of Mods on X-axis represents the cumulative number of modifications on cm-siRNAs i.e. total number of modifications (same or different) are present on the particular cm-siRNAs. Their respective numbers are also provided in proceeding rows on X-axis.

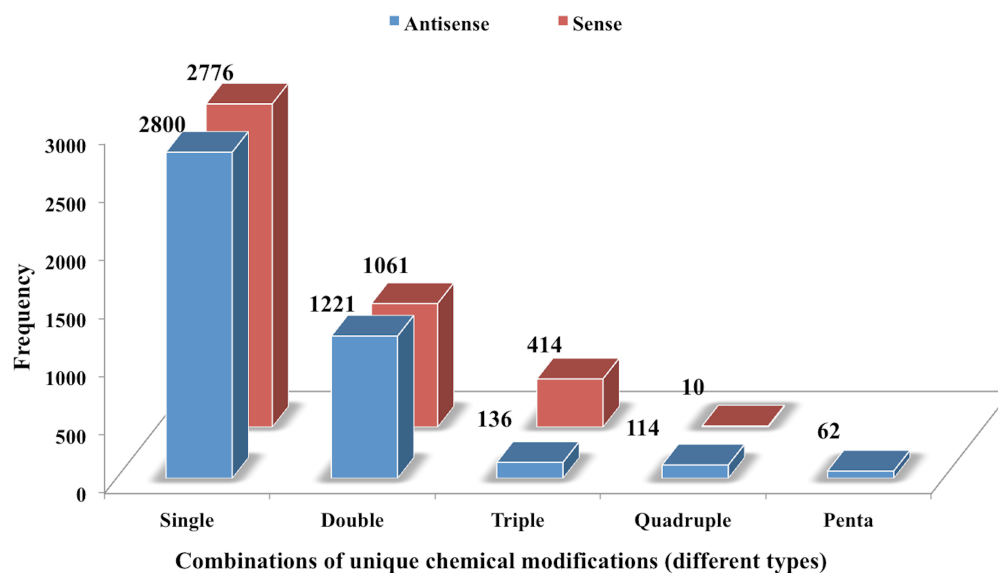

**Figure S4.** Grouping frequency of different unique chemical modifications i.e. how many different modifications are grouped in cm-siRNAs.

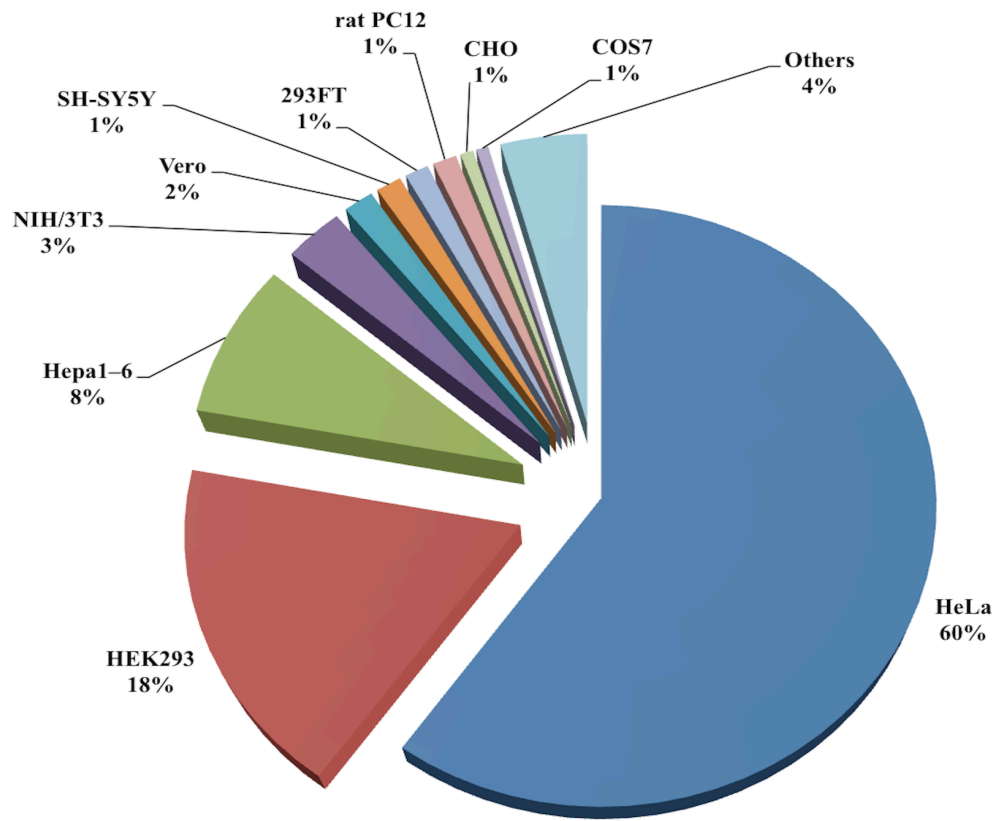

**Figure S5.** Cell lines distribution in siRNAmoD database.
